# Supplementary material for: Recycling PVC Waste into CO2 Adsorbents: Optimizing Pyrolysis Valorization with Neuro-Fuzzy Models
Source: MDPI journal article supplement (doi:10.3390/pr12030431), 2024-02-20
Supplement: s1 [file s1]

## Supplementary materials

**Table S1.** Operating parameters introduced in ANFIS edit tool.

| Sample No. | Act. Agent (A) | Temperature °C (T) | Ratio (D) | CO <sub>2</sub> Uptake mg/g (y <sub>e</sub> ) |
|------------|----------------|--------------------|-----------|-----------------------------------------------|
| 1          | 1              | 760                | 0.5       | 37.3                                          |
| 2*         | 1              | 800                | 0.5       | 37.4                                          |
| 3          | 1              | 800                | 0.66      | 32.7                                          |
| 4          | 1              | 800                | 0.33      | 36.4                                          |
| 5          | 1              | 840                | 0.5       | 35.3                                          |
| 6          | 2              | 760                | 0.33      | 45.6                                          |
| 7          | 2              | 760                | 0.66      | 14.8                                          |
| 8          | 2              | 800                | 0,5       | 37.6                                          |
| 9          | 2              | 840                | 0.66      | 22.7                                          |
| 10         | 2              | 840                | 0.33      | 35.1                                          |
| 11         | 0              | 760                | 0         | 26.4                                          |
| 12         | 0              | 800                | 0         | 11.7                                          |
| 13         | 0              | 840                | 0         | 6.4                                           |

\*Central point

```
function y=adco2(A,T,D)
a1=-0.2391;
a2=79.22; a3=-
23.15;
a4=72.34; a5=-
44.18;
a6=107.1;
a7=107.3; a8=-
28.17;
a9=114.8;
a10=-16.98;
a11=60.34;
a12=3.496;
c11=-0.0005325;
an11=0.8484;
c12=2;
an12=0.8489; c21=760;
an21=16.99;
c22=800;
an22=16.99;
c23=840;
an23=16.99;
c31=0.2083;
an31=0.341;
c32=0.6699;
an32=0.4854;
f11=exp(-.5*((A-c11)./an11).^2);
f12=exp(-.5*((A-c12)./an12).^2);
f21=exp(-.5*((T-c21)./an21).^2);
f22=exp(-.5*((T-c22)./an22).^2);
f23=exp(-.5*((T-c23)./an23).^2);
```

```

f31=exp(-.5*((D-c31)./an31).^2);
f32=exp(-.5*((D-c32)./an32).^2); y=(a1.*f11.*f21.*f31 +a2.*f11.*f21.*f32 +a3.*f11.*f22.*f31 +a4.*f11.*f22.*f32
+a5.*f11.*f23.*f31 +a6.*f11.*f23.*f32 +a7.*f12.*f21.*f31 +a8.*f12.*f21.*f32 +a9.*f12.*f22.*f31 +a10.*f12.*f22.*f32
+a11.*f12.*f23.*f31 +a12.*f12.*f23.*f32). /(f11.*f21.*f31 +f11.*f21.*f32 +f11.*f22.*f31 +f11.*f22.*f32 +f11.*f23.*f31
+f11.*f23.*f32 +f12.*f21.*f31 +f12.*f21.*f32 +f12.*f22.*f31 +f12.*f22.*f32 +f12.*f23.*f31 +f12.*f23.*f32); end

```

**Script S1.** Script designed from the experimental results, and neuro-fuzzy variables. This script was used to carry out CO<sub>2</sub> adsorption predictions.
